# Supplementary material for: Comparative Performance in the Detection of Four Coronavirus Genera from Human, Animal, and Environmental Specimens
Source: MDPI journal article supplement (doi:10.3390/v16040534), 2024-03-29
Supplement: s1 [file s1]

**Table S1. Pan-CoV primers and PCR protocol used in this study.**

| PCR name         | PCR format      | Primer's name | Sequence (5' - 3')             | Protocol                                                                                                                                                                                                            | Amplicon size (bp) | Targeted region * | Reference                              |
|------------------|-----------------|---------------|--------------------------------|---------------------------------------------------------------------------------------------------------------------------------------------------------------------------------------------------------------------|--------------------|-------------------|----------------------------------------|
| <b>Q-CoV PCR</b> | Two-step RT-PCR | CoV-FWD1      | CGTTGGIACWAAYBTVCCWYTICARBTRGG | 95°C 5 min, then 15 cycles of 95°C for 30 seconds, 65°C for 30 seconds and 72°C for 45 seconds, then 35 cycles of 94°C for 30 seconds, 50°C for 30 seconds and 72°C for 45 seconds. Finish with 72°C for 7 minutes. | 520                | 17,480-17,820.    | Quan, PL. et al. [26]                  |
|                  |                 | CoV-RVS1      | GGTCATKATAGRCTCAVMASWWGCNACATG |                                                                                                                                                                                                                     |                    |                   |                                        |
|                  | Nested PCR      | CoV-FWD2      | GGCWCCWCCHGGNGARCAATT          | Same protocol for rounds 1 and 2.                                                                                                                                                                                   | 328                |                   |                                        |
|                  |                 | CoV-RVS2      | GGWAWCCCCAYTGYTGWAYRTC         |                                                                                                                                                                                                                     |                    |                   |                                        |
| <b>W-CoV PCR</b> | Two-step PCR    | CoV-FWD3      | GGTTGGGAYTAYCCHAARTGTGA        | 94°C 2 min, then 35 cycles of 94°C for 20 seconds, 50°C for 30 seconds and 72°C for 30 seconds. Finish with 72°C for 7 mins.                                                                                        | 440                | 14,370- 14,750    | Modified from Watanabe, S. et al. [29] |
|                  |                 | CoV-RVS3      | CCATCATCASWYRAATCATCATA        |                                                                                                                                                                                                                     |                    |                   |                                        |
|                  |                 | CoV-FWD4      | GAYTAYCCHAARTGTGAYAGAGC        |                                                                                                                                                                                                                     | 434                |                   |                                        |
|                  | Hemi-nested     |               |                                | Same protocol for rounds 1 and 2.                                                                                                                                                                                   |                    |                   |                                        |
| <b>X-CoV PCR</b> | Two-step PCR    | pan-CoV_outF  | CCAARTTYTAYGGHGGITGG           | 30 cycles of 94 °C for 15 s, 53.4 °C for 30 s and 68 °C for 1 min; a final extension at 68 °C for 5 min; and holding at 4 °C.                                                                                       | 670-673            | 14255-14927       | Xiu, L. et al. [21]                    |
|                  |                 | pan-CoV_R     | TGTTGIGARCARAAYTCATGIGG        |                                                                                                                                                                                                                     |                    |                   |                                        |
|                  |                 |               |                                |                                                                                                                                                                                                                     |                    |                   |                                        |
|                  | Hemi-nested     | pan-CoV_inF   | GGTTGGGAYTAYCCHAARTGTGA        | 94 °C for 5 min; 35 cycles of 94 °C for 15 s, 54.5 °C for 30 s and 72 °C for 1 min; and a final extension of 72 °C for 10 min.                                                                                      | 599-602            |                   |                                        |

\* The position of PCR product compare with whole genome of HCoV-229E (Gen Bank accession No. NC\_002645.1)

Table S2. Comparative results of three pan-CoV PCR assays in human samples.

| Sample ID | Collection date | Sample type                       | Real-time PCR results |           | PCR and sequencing results tested by three pan-CoV PCR assays |            |            |
|-----------|-----------------|-----------------------------------|-----------------------|-----------|---------------------------------------------------------------|------------|------------|
|           |                 |                                   | Detected virus        | Ct values | Q-CoV PCR                                                     | W-CoV PCR  | X-CoV PCR  |
| H001      | 20-Oct-22       | Nasopharyngeal swab               | HCoV-OC43             | 16.92     | HCoV-OC43                                                     | HCoV-OC43  | HCoV-OC43  |
| H002      | 16-May-23       | Nasopharyngeal swab               | HCoV-OC43             | 19.9      | HCoV-OC43                                                     | HCoV-OC43  | HCoV-OC43  |
| H003      | 4-Mar-23        | Nasopharyngeal swab               | HCoV-OC43             | 25.72     | HCoV-OC43                                                     | HCoV-OC43  | HCoV-OC43  |
| H004      | 3-Jan-23        | Nasopharyngeal swab               | HCoV-OC43             | 27.44     | HCoV-OC43                                                     | HCoV-OC43  | HCoV-OC43  |
| H005      | 1-Mar-23        | Nasopharyngeal swab               | HCoV-OC43             | 28.13     | HCoV-OC43                                                     | HCoV-OC43  | HCoV-OC43  |
| H006      | 28-Jan-23       | Nasal swab                        | HCoV-OC43             | 28.65     | HCoV-OC43                                                     | Negative   | Negative   |
| H007      | 3-May-23        | Nasopharyngeal swab               | HCoV-OC43             | 31.16     | HCoV-OC43                                                     | Negative   | Negative   |
| H008      | 28-Jan-23       | Nasal swab                        | H-CoV 229E            | 12.8      | H-CoV 229E                                                    | H-CoV 229E | H-CoV 229E |
| H009      | 28-Jan-23       | Nasopharyngeal swab               | H-CoV 229E            | 16.41     | H-CoV 229E                                                    | H-CoV 229E | H-CoV 229E |
| H010      | 28-Jan-23       | Nasal swab                        | H-CoV 229E            | 22.78     | H-CoV 229E                                                    | H-CoV 229E | H-CoV 229E |
| H011      | 28-Jan-23       | Nasopharyngeal swab               | H-CoV 229E            | 27.15     | H-CoV 229E                                                    | H-CoV 229E | H-CoV 229E |
| H012      | 3-May-23        | Nasopharyngeal swab               | H-CoV 229E            | 28.07     | H-CoV 229E                                                    | Negative   | H-CoV 229E |
| H013      | 15-May-23       | Nasopharyngeal swab               | HCoV HKU1             | 23.4      | HCoV HKU1                                                     | Negative   | HCoV HKU1  |
| H014      | 26-Dec-23       | Nasopharyngeal swab               | SARS-CoV-2            | 24.71     | SARS-CoV-2                                                    | Negative   | SARS-CoV-2 |
| H015      | 13-Jan-23       | Nasopharyngeal swab               | SARS-CoV-2            | 26.25     | SARS-CoV-2                                                    | Negative   | SARS-CoV-2 |
| H016      | 25-Dec-23       | Nasopharyngeal swab               | SARS-CoV-2            | 26.88     | SARS-CoV-2                                                    | Negative   | SARS-CoV-2 |
| H017      | 18-Aug-23       | Nasopharyngeal swab               | SARS-CoV-2            | 27.45     | SARS-CoV-2                                                    | Negative   | SARS-CoV-2 |
| H018      | 10-Jan-23       | Nasopharyngeal swab               | SARS-CoV-2            | 29.86     | SARS-CoV-2                                                    | Negative   | SARS-CoV-2 |
| H019      | 16-Jan-23       | Nasopharyngeal swab               | SARS-CoV-2            | 30.86     | SARS-CoV-2                                                    | Negative   | SARS-CoV-2 |
| H020      | 20-Oct-22       | Nasopharyngeal swab               | SARS-CoV-2            | 29.4      | SARS-CoV-2                                                    | Negative   | SARS-CoV-2 |
| H021      | 27-Sep-23       | Nasopharyngeal swab               | HCoV NL63             | 20.99     | HCoV NL63                                                     | Negative   | HCoV NL63  |
| H022      | 18-Jul-23       | Nasopharyngeal swab               | HCoV NL63             | 29.51     | Negative                                                      | Negative   | HCoV NL63  |
| H023      | 30-May-23       | Nasopharyngeal swab               | HCoV NL63             | 29.5      | Negative                                                      | Negative   | HCoV NL63  |
| H024      | 19-Dec-22       | Nasopharyngeal swab               | Negative              | Negative  | Negative                                                      | Negative   | Negative   |
| H025      | 22-Dec-22       | Nasopharyngeal swab               | Negative              | Negative  | Negative                                                      | Negative   | Negative   |
| H026      | 20-Dec-22       | Nasopharyngeal swab               | Negative              | Negative  | Negative                                                      | Negative   | Negative   |
| H027      | 26-Dec-22       | Nasopharyngeal swab + Throat swab | Negative              | Negative  | Negative                                                      | Negative   | Negative   |
| H028      | 26-Dec-22       | Nasopharyngeal swab + Throat swab | Negative              | Negative  | Negative                                                      | Negative   | Negative   |
| H029      | 26-Dec-22       | Nasopharyngeal swab + Throat swab | Negative              | Negative  | Negative                                                      | Negative   | Negative   |
| H030      | 27-Dec-22       | Nasopharyngeal swab + Throat swab | Negative              | Negative  | Negative                                                      | Negative   | Negative   |
| H031      | 30-Dec-22       | Nasopharyngeal swab + Throat swab | Negative              | Negative  | Negative                                                      | Negative   | Negative   |
| H032      | 30-Dec-22       | Nasopharyngeal swab + Throat swab | Negative              | Negative  | Negative                                                      | Negative   | Negative   |
| H033      | 2-Jan-22        | Nasopharyngeal swab + Throat swab | Negative              | Negative  | Negative                                                      | Negative   | Negative   |
| H034      | 4-Jan-22        | Nasopharyngeal swab + Throat swab | Negative              | Negative  | Negative                                                      | Negative   | Negative   |
| H035      | 4-Jan-23        | Nasopharyngeal swab + Throat swab | Negative              | Negative  | Negative                                                      | Negative   | Negative   |
| H036      | 8-Jan-23        | Nasopharyngeal swab + Throat swab | Negative              | Negative  | Negative                                                      | Negative   | Negative   |
| H037      | 9-Jan-23        | Nasopharyngeal swab + Throat swab | Negative              | Negative  | Negative                                                      | Negative   | Negative   |
| H038      | 9-Jan-23        | Nasopharyngeal swab + Throat swab | Negative              | Negative  | Negative                                                      | Negative   | Negative   |
| H039      | 9-Jan-23        | Nasopharyngeal swab + Throat swab | Negative              | Negative  | Negative                                                      | Negative   | Negative   |
| H040      | 9-Jan-23        | Tracheal suction                  | Negative              | Negative  | Negative                                                      | Negative   | Negative   |
| H041      | 11-Jan-23       | Nasopharyngeal swab + Throat swab | Negative              | Negative  | Negative                                                      | Negative   | Negative   |
| H042      | 20-Jan-23       | Nasopharyngeal swab + Throat swab | Negative              | Negative  | Negative                                                      | Negative   | Negative   |
| H043      | 20-Jan-23       | Nasopharyngeal swab + Throat swab | Negative              | Negative  | Negative                                                      | Negative   | Negative   |
| H044      | 20-Jan-23       | Nasopharyngeal swab + Throat swab | Negative              | Negative  | Negative                                                      | Negative   | Negative   |
| H045      | 17-Jan-23       | Nasopharyngeal swab + Throat swab | Negative              | Negative  | Negative                                                      | Negative   | Negative   |
| H046      | 17-Jan-23       | Nasopharyngeal swab + Throat swab | Negative              | Negative  | Negative                                                      | Negative   | Negative   |
| H047      | 20-Jan-23       | Nasopharyngeal and throat swab    | Negative              | Negative  | Negative                                                      | Negative   | Negative   |
| H048      | 20-Jan-23       | Nasopharyngeal and throat swab    | Negative              | Negative  | Negative                                                      | Negative   | Negative   |
| H049      | 20-Jan-23       | Tracheal suction                  | Negative              | Negative  | Negative                                                      | Negative   | Negative   |
| H050      | 8-Feb-23        | Nasopharyngeal swab               | Negative              | Negative  | Negative                                                      | Negative   | Negative   |

**Table S3. Comparative results of three pan-CoV PCR assays in wastewater samples.**

| Sample ID | Source       | Collection date | Sample type    | Real-time PCR | PCR ct values | PCR and sequencing results tested by three pan-CoV PCR assays |           |             |
|-----------|--------------|-----------------|----------------|---------------|---------------|---------------------------------------------------------------|-----------|-------------|
|           |              |                 |                |               |               | Q-CoV PCR                                                     | W-CoV PCR | X-CoV PCR   |
| W01       | Hospital     | 7-Jul-22        | Wastewater     | Positive      | 28.08         | SARS-CoV-2                                                    | Negative  | SARS-CoV-2* |
| W02       | Hospital     | 27-Sep-22       | Wastewater     | Positive      | 29.39         | SARS-CoV-2                                                    | Negative  | SARS-CoV-2* |
| W03       | Hospital     | 10-Apr-22       | Wastewater     | Positive      | 25.59         | SARS-CoV-2                                                    | Negative  | SARS-CoV-2  |
| W04       | Hospital     | 22-Nov-22       | Wastewater     | Positive      | 29.03         | SARS-CoV-2                                                    | HCoV-OC43 | SARS-CoV-2* |
| W05       | Hospital     | 22-Nov-22       | Wastewater     | Positive      | 29.57         | SARS-CoV-2                                                    | HCoV-OC43 | SARS-CoV-2* |
| W06       | Hospital     | 13-Dec-22       | Wastewater     | Positive      | 27.64         | SARS-CoV-2                                                    | HCoV-229E | HCoV-229E   |
| W07       | Hospital     | 13-Dec-22       | Wastewater     | Positive      | 29.68         | SARS-CoV-2                                                    | HCoV-229E | HCoV-229E*  |
| W08       | Hospital     | 4-Apr-23        | Wastewater     | Positive      | 25.48         | SARS-CoV-2                                                    | Negative  | SARS-CoV-2  |
| W09       | Hospital     | 18-Apr-23       | Wastewater     | Positive      | 29.99         | SARS-CoV-2                                                    | Negative  | SARS-CoV-2  |
| W10       | Hospital     | 13-Dec-22       | Wastewater     | Positive      | 32.22         | HCoV-OC43                                                     | HCoV-OC43 | HCoV-OC43*  |
| W11       | Hospital     | 25-Oct-22       | Wastewater     | Positive      | 32.66         | HCoV-OC43                                                     | HCoV-OC43 | HCoV-OC43*  |
| W12       | Hospital     | 20-Dec-22       | Wastewater     | Positive      | 31.54         | HCoV-OC43                                                     | Negative  | HCoV-OC43*  |
| W13       | Hospital     | 1-Mar-23        | Wastewater     | Positive      | 32.47         | HCoV-OC43                                                     | Negative  | HCoV-OC43*  |
| W14       | Hospital     | 17-Jan-23       | Wastewater     | Positive      | 30.49         | HCoV-OC43                                                     | Negative  | HCoV-OC43*  |
| W15       | Hospital     | 24-Jan-23       | Wastewater     | Positive      | 33.23         | HCoV-229E                                                     | Negative  | HCoV-229E*  |
| W16       | Hospital     | 14-Mar-23       | Wastewater     | Positive      | 34.40         | HCoV-OC43                                                     | Negative  | HCoV-OC43   |
| W17       | Hospital     | 25-Apr-23       | Wastewater     | Positive      | 30.24         | HCoV-OC43*                                                    | Negative  | HCoV-OC43*  |
| W18       | Hospital     | 23-May-23       | Wastewater     | Positive      | 36.62         | HCoV-OC43                                                     | Negative  | HCoV-OC43*  |
| W19       | Hospital     | 23-May-23       | Wastewater     | Positive      | 33.37         | HCoV-OC43                                                     | Negative  | HCoV-OC43*  |
| W20       | Hospital     | 23-May-23       | Wastewater     | Positive      | 31.25         | HCoV-OC43                                                     | Negative  | HCoV-OC43   |
| W21       | Hospital     | 23-May-23       | Wastewater     | Positive      | 31.7          | HCoV-OC43*                                                    | Negative  | HCoV-OC43*  |
| W22       | BKK Airport- | 18-Oct-23       | Lavatory waste | Positive      | 30.3          | Negative                                                      | Negative  | SARS-CoV-2  |
| W23       | BKK Airport- | 18-Oct-23       | Lavatory waste | Positive      | 30.45         | Negative                                                      | Negative  | SARS-CoV-2* |
| W24       | BKK Airport- | 9-Nov-23        | Lavatory waste | Positive      | 30.43         | HCoV-OC43*                                                    | Negative  | SARS-CoV-2* |
| W25       | BKK Airport- | 9-Nov-23        | Lavatory waste | Positive      | 28.62         | HCoV-OC43*                                                    | Negative  | SARS-CoV-2  |
| W26       | BKK Airport- | 19-Oct-23       | Lavatory waste | Positive      | 33.1          | Negative                                                      | Negative  | Negative    |
| W27       | BKK Airport- | 19-Oct-23       | Lavatory waste | Positive      | 34.28         | HCoV-229E                                                     | Negative  | Negative    |
| W28       | Hospital     | 14/3/2023       | Wastewater     | Negative      | Negative      | HCoV-229E                                                     | Negative  | HCoV-OC43*  |
| W29       | Hospital     | 28/2/2023       | Wastewater     | Negative      | Negative      | HCoV-OC43                                                     | Negative  | HCoV-OC43*  |
| W30       | BKK Airport  | 15-Oct-23       | Lavatory waste | Negative      | Negative      | HCoV-229E                                                     | Negative  | Negative    |
| W31       | BKK Airport  | 27-Nov-23       | Lavatory waste | Negative      | Negative      | HCoV-229E                                                     | Negative  | Negative    |
| W32       | BKK Airport  | 27-Nov-23       | Lavatory waste | Negative      | Negative      | HCoV-229E                                                     | Negative  | Negative    |
| W33       | BKK Airport  | 27-Nov-23       | Lavatory waste | Negative      | Negative      | HCoV-229E                                                     | Negative  | Negative    |
| W34       | BKK Airport- | 1-Oct-23        | Lavatory waste | Negative      | Negative      | Negative                                                      | Negative  | Negative    |
| W35       | BKK Airport- | 1-Oct-23        | Lavatory waste | Negative      | Negative      | Negative                                                      | Negative  | Negative    |
| W36       | BKK Airport- | 3-Oct-23        | Lavatory waste | Negative      | Negative      | Negative                                                      | Negative  | Negative    |
| W37       | BKK Airport- | 6-Oct-23        | Lavatory waste | Negative      | Negative      | Negative                                                      | Negative  | Negative    |
| W38       | BKK Airport- | 6-Oct-23        | Lavatory waste | Negative      | Negative      | Negative                                                      | Negative  | Negative    |
| W39       | BKK Airport- | 6-Oct-23        | Lavatory waste | Negative      | Negative      | Negative                                                      | Negative  | Negative    |
| W40       | BKK Airport- | 6-Oct-23        | Lavatory waste | Negative      | Negative      | Negative                                                      | Negative  | Negative    |
| W41       | BKK Airport- | 15-Oct-23       | Lavatory waste | Negative      | Negative      | Negative                                                      | Negative  | Negative    |
| W42       | BKK Airport- | 18-Oct-23       | Lavatory waste | Negative      | Negative      | Negative                                                      | Negative  | Negative    |
| W43       | BKK Airport- | 18-Oct-23       | Lavatory waste | Negative      | Negative      | Negative                                                      | Negative  | Negative    |
| W44       | BKK Airport- | 31-Oct-23       | Lavatory waste | Negative      | Negative      | Negative                                                      | Negative  | Negative    |
| W45       | BKK Airport- | 31-Oct-23       | Lavatory waste | Negative      | Negative      | Negative                                                      | Negative  | Negative    |
| W46       | BKK Airport- | 31-Oct-23       | Lavatory waste | Negative      | Negative      | Negative                                                      | Negative  | Negative    |

\*The overlapped nucleotide peaks were found in the chromatogram, the major peaks were called for CoV species identification.

**Table S4. Comparative results of three pan-CoV PCR assays in bat samples.**

| Sample ID | Animal species               | Collection date | Sample type | PCR and sequencing results tested by three pan-CoV PCR assays |                         |                         |
|-----------|------------------------------|-----------------|-------------|---------------------------------------------------------------|-------------------------|-------------------------|
|           |                              |                 |             | Q-CoV PCR                                                     | W-CoV PCR               | X-CoV PCR               |
| B02       | <i>Hipposideros pomona</i>   | 22/6/2020       | Rectal swab | Coronavirus HKU10                                             | Coronavirus HKU10       | Coronavirus HKU10       |
| B01       | <i>Hipposideros larvatus</i> | 22/6/2020       | Rectal swab | Alphacoronavirus HIYN10                                       | Alphacoronavirus HIYN10 | Alphacoronavirus HIYN10 |
| B03       | <i>Hipposideros larvatus</i> | 22/6/2020       | Rectal swab | Alphacoronavirus HIYN10                                       | Alphacoronavirus HIYN10 | Alphacoronavirus HIYN10 |
| B04       | <i>Hipposideros larvatus</i> | 22/6/2020       | Rectal swab | Alphacoronavirus HIYN10                                       | Alphacoronavirus HIYN10 | Alphacoronavirus HIYN10 |
| B05       | <i>Hipposideros larvatus</i> | 22/6/2020       | Rectal swab | Alphacoronavirus HIYN10                                       | Alphacoronavirus HIYN10 | Alphacoronavirus HIYN10 |
| B06       | <i>Hipposideros larvatus</i> | 23/6/2020       | Rectal swab | Alphacoronavirus HIYN10                                       | Alphacoronavirus HIYN10 | Alphacoronavirus HIYN10 |
| B07       | <i>Hipposideros larvatus</i> | 23/6/2020       | Rectal swab | Alphacoronavirus HIYN10                                       | Alphacoronavirus HIYN10 | Alphacoronavirus HIYN10 |
| B08       | <i>Hipposideros larvatus</i> | 23/6/2020       | Rectal swab | Alphacoronavirus HIYN10                                       | Alphacoronavirus HIYN10 | Alphacoronavirus HIYN10 |
| B09       | <i>Hipposideros larvatus</i> | 23/6/2020       | Rectal swab | Alphacoronavirus HIYN10                                       | Alphacoronavirus HIYN10 | Alphacoronavirus HIYN10 |
| B10       | <i>Hipposideros larvatus</i> | 23/6/2020       | Rectal swab | Alphacoronavirus HIYN10                                       | Alphacoronavirus HIYN10 | Alphacoronavirus HIYN10 |
| B11       | <i>Hipposideros larvatus</i> | 23/6/2020       | Rectal swab | Alphacoronavirus HIYN10                                       | Alphacoronavirus HIYN10 | Alphacoronavirus HIYN10 |
| B12       | <i>Hipposideros larvatus</i> | 23/6/2020       | Rectal swab | Alphacoronavirus HIYN10                                       | Alphacoronavirus HIYN10 | Alphacoronavirus HIYN10 |
| B14       | <i>Rhinolophus spp.</i>      | 22/6/2020       | Rectal swab | Alphacoronavirus HIYN10                                       | Not detected            | Alphacoronavirus YN2012 |
| B16       | <i>Rhinolophus spp.</i>      | 23/6/2020       | Rectal swab | Alphacoronavirus HIYN10                                       | Not detected            | Not detected            |
| B13       | <i>Rhinolophus spp.</i>      | 22/6/2020       | Rectal swab | Alphacoronavirus RsYN14                                       | Alphacoronavirus RsYN14 | Alphacoronavirus RsYN14 |
| B15       | <i>Rhinolophus spp.</i>      | 22/6/2020       | Rectal swab | Alphacoronavirus RsYN14                                       | Alphacoronavirus RsYN14 | Alphacoronavirus RsYN14 |
| B17       | <i>Rhinolophus spp</i>       | 22/6/2020       | Rectal swab | Sarbecovirus Ra22QT77                                         | Not detected            | Sarbecovirus Ra22QT77   |
| B18       | <i>Rhinolophus spp</i>       | 22/6/2020       | Rectal swab | Sarbecovirus Ra22QT77                                         | Not detected            | Not detected            |
| B19       | <i>Rhinolophus spp</i>       | 22/6/2020       | Rectal swab | Sarbecovirus Ra22QT77                                         | Not detected            | Sarbecovirus Ra22QT77   |
| B20       | <i>Rhinolophus spp</i>       | 22/6/2020       | Rectal swab | Sarbecovirus Ra22QT77                                         | Not detected            | Alphacoronavirus HIYN10 |
| B21       | <i>Rhinolophus spp</i>       | 22/6/2020       | Rectal swab | Sarbecovirus Ra22QT77                                         | Not detected            | Sarbecovirus Ra22QT77   |
| B22       | <i>Rhinolophus spp</i>       | 22/6/2020       | Rectal swab | Sarbecovirus Ra22QT77                                         | Alphacoronavirus RaYN17 | Sarbecovirus Ra22QT77   |
| B23       | <i>Rhinolophus spp</i>       | 22/6/2020       | Rectal swab | Sarbecovirus Ra22QT77                                         | Alphacoronavirus RaYN17 | Sarbecovirus Ra22QT77   |
| B24       | <i>Rhinolophus spp</i>       | 23/6/2020       | Rectal swab | Sarbecovirus Ra22QT77                                         | Not detected            | Sarbecovirus Ra22QT77   |
| B25       | <i>Rhinolophus spp</i>       | 23/6/2020       | Rectal swab | Sarbecovirus Ra22QT77                                         | Not detected            | Sarbecovirus Ra22QT77   |
| B26       | <i>Rhinolophus spp</i>       | 23/6/2020       | Rectal swab | Sarbecovirus Ra22QT77                                         | Not detected            | Sarbecovirus Ra22QT77   |
| B27       | <i>Rhinolophus spp</i>       | 23/6/2020       | Rectal swab | Sarbecovirus Ra22QT77                                         | Not detected            | Sarbecovirus Ra22QT77   |
| B28       | <i>Rhinolophus spp</i>       | 23/6/2020       | Rectal swab | Sarbecovirus Ra22QT77                                         | Not detected            | Sarbecovirus Ra22QT77   |

Table S5. Comparative results of three pan-CoV PCR assays in avian samples.

| Sample ID | Host                  | Collection date | Sample type | PCR and sequencing results tested by three pan-CoV PCR assays |                             |                                         |
|-----------|-----------------------|-----------------|-------------|---------------------------------------------------------------|-----------------------------|-----------------------------------------|
|           |                       |                 |             | X-CoV PCR                                                     | Q-CoV PCR                   | W-CoV PCR                               |
| A01       | Whiskered Tern        | 28-Oct-20       | Rectal swab | Avian coronavirus Glaucous-winged gull CIR-66002              | Negative                    | Negative                                |
| A02       | Pigeon                | 12-Mar-21       | Oral swab   | Pigeon-dominant Coronavirus                                   | Pigeon-dominant Coronavirus | Negative                                |
| A03       | Lesser Whistling-duck | 18-Mar-21       | Rectal swab | Anser fabalis coronavirus NCN2                                | Negative                    | Anser fabalis coronavirus NCN2          |
| A04       | Lesser Whistling-duck | 18-Mar-21       | Rectal swab | Anser fabalis coronavirus NCN2                                | Negative                    | Anser fabalis coronavirus NCN2          |
| A05       | Lesser Whistling-duck | 18-Mar-21       | Oral swab   | Anser fabalis coronavirus NCN2                                | Negative                    | Anser fabalis coronavirus NCN2          |
| A06       | Little Egret          | 29-Sep-21       | Rectal swab | Avian coronavirus isolate CoV-9518-2016                       | Negative                    | Avian coronavirus isolate CoV-9518-2016 |
| A07       | Little Egret          | 29-Sep-21       | Oral swab   | Avian coronavirus isolate CoV-9518-2016                       | Negative                    | Negative                                |
| A08       | Cattle Egret          | 12-Mar-21       | Rectal swab | Unclassified Deltacoronavirus sp.                             | Negative                    | Negative                                |
| A09       | Cattle Egret          | 12-Mar-21       | Rectal swab | Night-heron coronavirus HKU19                                 | Negative                    | Negative                                |
| A10       | Cattle Egret          | 12-Mar-21       | Rectal swab | Unclassified Deltacoronavirus sp.                             | Negative                    | Negative                                |
| A11       | Cattle Egret          | 12-Mar-21       | Rectal swab | Unclassified Deltacoronavirus sp.                             | Negative                    | Negative                                |
| A12       | Cattle Egret          | 12-Mar-21       | Rectal swab | Unclassified Deltacoronavirus sp.                             | Negative                    | Negative                                |
| A13       | Cattle Egret          | 12-Mar-21       | Rectal swab | Unclassified Deltacoronavirus sp.                             | Negative                    | Negative                                |
| A14       | Indian Cormorant      | 12-Mar-21       | Rectal swab | Unclassified Deltacoronavirus sp.                             | Negative                    | Negative                                |
| A15       | Indian Cormorant      | 12-Mar-21       | Rectal swab | Unclassified Deltacoronavirus sp.                             | Negative                    | Negative                                |
| A16       | House Swallow         | 21-Dec-20       | Rectal swab | Magpie-robin coronavirus HKU18                                | Negative                    | Negative                                |
| A17       | House Swallow         | 21-Dec-20       | Oral swab   | Magpie-robin coronavirus HKU18                                | Negative                    | Negative                                |

**Table S6. Number of primer mismatches found in each primer used in this study.**

| Coronavirus          | No. of reference WGS used* | CoV PCR protocol -Primer name<br>No. of Primer mismatches (number of mapped CoV WGS) |         |         |         |         |         |          |         |         |         |
|----------------------|----------------------------|--------------------------------------------------------------------------------------|---------|---------|---------|---------|---------|----------|---------|---------|---------|
|                      |                            | Q-FWD1                                                                               | Q-FWD2  | Q-RVS1  | Q-RVS2  | W-FWD3  | FWD4    | RVS3     | X-OutF  | X-InF   | X-R     |
| HCoV-HKU1            | 85                         | 3 (81)                                                                               | 2 (36)  | 4 (47)  | 1 (47)  | 0 (84)  | 1 (84)  | 0 (82)   | 0 (84)  | 0 (84)  | 0 (83)  |
|                      |                            | 14 (3)                                                                               | 4 (47)  | 5 (38)  | 2 (38)  | 8 (1)   | 10 (1)  | 7 (3)    | 1 (1)   | 1 (1)   | 9 (1)   |
|                      |                            | 15 (1)                                                                               | 7 (1)   |         |         |         |         |          |         |         | 11 (1)  |
|                      |                            | 8 (1)                                                                                |         |         |         |         |         |          |         |         |         |
| HCoV-NL63            | 158                        | 3 (1)                                                                                | 2 (154) | 4 (12)  | 2 (157) | 0 (158) | 1 (157) | 7 (158)  | 0 (158) | 0 (158) | 1 (158) |
|                      |                            | 4 (151)                                                                              | 3 (3)   | 5 (145) | 4 (1)   |         | 2 (1)   |          |         |         |         |
|                      |                            | 5 (5)                                                                                | 9 (1)   | 6 (1)   |         |         |         |          |         |         |         |
|                      |                            | 11 (11)                                                                              |         |         |         |         |         |          |         |         |         |
| HCoV-229E            | 117                        | 2 (117)                                                                              | 1 (117) | 2 (7)   | 2 (117) | 1 (24)  | 1 (24)  | 1 (110)  | 0 (116) | 1 (24)  | 1 (116) |
|                      |                            |                                                                                      |         | 3 (109) |         | 2 (92)  | 2 (92)  | 2 (6)    | 5 (1)   | 2 (92)  | 2 (1)   |
|                      |                            |                                                                                      |         | 4 (1)   |         | 6 (1)   | 6 (1)   | 10 (1)   |         | 6 (1)   |         |
|                      |                            |                                                                                      |         |         |         |         |         |          |         |         |         |
| HCoV-OC43            | 331                        | 1 (308)                                                                              | 1 (329) | 2 (337) | 2 (330) | 0 (328) | 1 (330) | 0 (330)  | 1 (330) | 0 (328) | 0 (317) |
|                      |                            | 2 (21)                                                                               | 2 (1)   | 3 (2)   | 7 (1)   | 1 (3)   | 2 (1)   | 12 (1)   | 3 (1)   | 1 (3)   | 1 (14)  |
|                      |                            | 13 (2)                                                                               | 4 (1)   | 11 (2)  |         |         |         |          |         |         |         |
|                      |                            |                                                                                      |         |         |         |         |         |          |         |         |         |
| MERS-CoV             | 342                        | 16 (342)                                                                             | 3 (342) | 4 (342) | 2 (342) | 0 (341) | 1 (341) | 2 (331)  | 1 (341) | 0 (341) | 0 (1)   |
|                      |                            |                                                                                      |         |         |         | 10 (1)  | 9 (1)   | 3 (9)    | 8 (1)   | 10 (1)  | 1 (340) |
|                      |                            |                                                                                      |         |         |         |         |         | 10 (2)   |         |         | 7 (1)   |
|                      |                            |                                                                                      |         |         |         |         |         |          |         |         |         |
| SARS-CoV             | 8                          | 2 (8)                                                                                | 4 (8)   | 1 (8)   | 3 (8)   | 0 (8)   | 1 (8)   | 9 (8)    | 1 (8)   | 0 (8)   | 2 (8)   |
|                      |                            |                                                                                      |         |         |         |         |         |          |         |         |         |
|                      |                            |                                                                                      |         |         |         |         |         |          |         |         |         |
|                      |                            |                                                                                      |         |         |         |         |         |          |         |         |         |
| SARS-CoV-2           | 200                        | 1 (1)                                                                                | 4 (198) | 2 (197) | 2 (199) | 0 (200) | 1 (200) | 6 (1)    | 1 (199) | 0 (200) | 0 (200) |
|                      |                            | 2 (196)                                                                              | 5 (1)   | 3 (3)   | 3 (1)   |         |         | 7 (1)    | 2 (1)   |         |         |
|                      |                            | 5 (3)                                                                                | 6 (1)   |         |         |         |         | 8 (139)  |         |         |         |
|                      |                            |                                                                                      |         |         |         |         |         | 11 (56)  |         |         |         |
| Bat Alphacoronavirus | 134                        |                                                                                      |         |         |         |         |         | 12 (3)   |         |         |         |
|                      |                            | 0 (2)                                                                                | 1 (38)  | 0 (4)   | 0 (2)   | 0 (84)  | 1 (120) | 5 (13)   | 0 (24)  | 0 (84)  | 0 (83)  |
|                      |                            | 1 (11)                                                                               | 2 (78)  | 1 (19)  | 1 (59)  | 1 (43)  | 2 (11)  | 6 (13)   | 1 (110) | 1 (43)  | 1 (49)  |
|                      |                            | 2 (64)                                                                               | 3 (17)  | 2 (36)  | 2 (51)  | 2 (7)   | 3 (3)   | 7 (26)   |         | 2 (7)   | 2 (2)   |
|                      |                            | 3 (36)                                                                               | 8 (1)   | 3 (18)  | 3 (20)  |         |         | 8 (5)    |         |         |         |
|                      |                            | 4 (13)                                                                               |         | 4 (9)   | 4 (2)   |         |         | 9 (7)    |         |         |         |
|                      |                            | 5 (6)                                                                                |         | 5 (21)  |         |         |         | 10 (19)  |         |         |         |
|                      |                            | 16 (1)                                                                               |         | 6 (24)  |         |         |         | 11 (39)  |         |         |         |
| Bat Betacoronavirus  | 263                        | 17 (1)                                                                               |         | 9 (3)   |         |         |         | 12 (12)  |         |         |         |
|                      |                            | 1 (22)                                                                               | 0 (1)   | 1 (125) | 1 (11)  | 0 (245) | 1 (229) | 4 (2)    | 0 (3)   | 0 (245) | 0 (35)  |
|                      |                            | 2 (167)                                                                              | 1 (6)   | 2 (71)  | 2 (159) | 1 (17)  | 2 (33)  | 5 (5)    | 1 (231) | 1 (17)  | 1 (111) |
|                      |                            | 3 (40)                                                                               | 2 (26)  | 3 (19)  | 3 (77)  | 2 (1)   | 3 (1)   | 6 (7)    | 2 (29)  | 2 (1)   | 2 (117) |
|                      |                            | 4 (1)                                                                                | 3 (114) | 4 (28)  | 4 (16)  |         |         | 7 (15)   |         |         |         |
|                      |                            | 5 (1)                                                                                | 4 (113) | 5 (7)   |         |         |         | 8 (23)   |         |         |         |
|                      |                            | 9 (2)                                                                                | 5 (3)   | 6 (5)   |         |         |         | 9 (86)   |         |         |         |
|                      |                            | 10 (2)                                                                               |         | 7 (8)   |         |         |         | 10 (99)  |         |         |         |
|                      |                            | 15 (3)                                                                               |         |         |         |         |         | 11 (14)  |         |         |         |
|                      |                            | 16 (13)                                                                              |         |         |         |         |         | 12 (8)   |         |         |         |
|                      |                            | 17 (7)                                                                               |         |         |         |         |         | 13 (4)   |         |         |         |
| Gamma-CoV            | 696                        | 18 (4)                                                                               |         |         |         |         |         |          |         |         |         |
|                      |                            | 19 (1)                                                                               |         |         |         |         |         |          |         |         |         |
|                      |                            | 1 (194)                                                                              | 0 (21)  | 1 (12)  | 1 (494) | 0 (632) | 1 (560) | 5 (23)   | 0 (345) | 0 (632) | 0 (170) |
|                      |                            | 2 (134)                                                                              | 1 (538) | 2 (88)  | 2 (170) | 1 (35)  | 2 (106) | 6 (64)   | 1 (322) | 1 (35)  | 1 (473) |
|                      |                            | 3 (326)                                                                              | 2 (68)  | 3 (240) | 3 (1)   | 7 (1)   | 3 (1)   | 7 (13)   | 5 (1)   | 7 (1)   | 2 (21)  |
| Delta-CoV            | 36                         | 4 (37)                                                                               | 3 (62)  | 4 (337) | 4 (2)   | 8 (15)  | 7 (1)   | 11 (161) | 6 (11)  | 8 (15)  | 3 (1)   |
|                      |                            | 5 (8)                                                                                | 4 (10)  | 5 (19)  | 6 (3)   | 9 (1)   | 8 (20)  | 13 (347) | 7 (2)   | 9 (1)   | 6 (1)   |
|                      |                            | 1 (6)                                                                                | 2 (6)   | 2 (12)  | 6 (3)   | 0 (26)  | 2 (24)  | 5 (8)    | 0 (35)  | 0 (26)  | 0 (16)  |
|                      |                            | 2 (6)                                                                                | 3 (18)  | 3 (8)   | 7 (11)  | 1 (10)  | 3 (12)  | 8 (4)    | 1 (1)   | 1 (10)  | 1 (20)  |
|                      |                            | 3 (7)                                                                                | 4 (8)   | 4 (4)   | 8 (5)   |         |         | 10 (6)   |         |         |         |
|                      |                            | 4 (7)                                                                                | 5 (2)   | 5 (8)   | 9 (13)  |         |         | 11 (11)  |         |         |         |
|                      |                            | 5 (8)                                                                                | 6 (2)   | 6 (2)   | 10 (2)  |         |         | 13 (7)   |         |         |         |

\*Whole genome sequences of coronavirus were download from NCBI Gen Bank (accessed on 7 January 2024) and used for primer mapping.
